# Supplementary material for: A Study of 41 Canine Orthologues of Human Genes Involved in Monogenic Obesity Reveals Marker in the ADCY3 for Body Weight in Labrador Retrievers
Source: MDPI journal article supplement (doi:10.3390/vetsci10060390), 2023-06-08
Supplement: s1 [file s1]

**Table S1.** The 41 genes linked to monogenic obesity in humans, and their orthologs in the canine genome.

| HUGO gene ID | Ensembl gene ID<br>(CanFam3.1) | Position               |
|--------------|--------------------------------|------------------------|
| MC4R         | ENSCAFG00000000090             | 1: 16131589-16133079   |
| NTRK2        | ENSCAFG00000001380             | 1: 74449060-74777032   |
| DYRK1B       | ENSCAFG00000005428             | 1: 113644100-113828488 |
| NR0B2        | ENSCAFG00000012261             | 2: 73234586-73236206   |
| PAX7         | ENSCAFG00000015539             | 2: 79815748-73236206   |
| PCSK1        | ENSCAFG00000007882             | 3: 13233594-13274094   |
| MAGEL2       | ENSCAFG00000010136             | 3: 36363930-36365870   |
| ABLIM3       | ENSCAFG00000018323             | 4: 59690735-59798383   |
| GHR          | ENSCAFG00000018579             | 4: 67022252-67290473   |
| LEPR         | ENSCAFG00000018600             | 5: 44688109-44775636   |
| CDH15        | ENSCAFG00000019846             | 5: 64258741-64277190   |
| SH2B1        | ENSCAFG00000017219             | 6: 18371832-18380962   |
| SDCCAG8      | ENSCAFG00000015803             | 7: 34396345-34631462   |
| TTC8         | ENSCAFG00000017478             | 8: 60061732-60115075   |
| MKS1         | ENSCAFG00000017464             | 9: 32860995-32879338   |
| WDPCP        | ENSCAFG00000003119             | 10: 62877527-63316345  |
| TRIM32       | ENSCAFG00000003516             | 11: 70462007-70463974  |
| PHIP         | ENSCAFG00000002804             | 12: 39904603-40032194  |
| SIM1         | ENSCAFG00000003538             | 12: 58485823-58553192  |
| VPS13B       | ENSCAFG00000000507             | 13: 1101610-1871225    |
| LEP          | ENSCAFG00000001672             | 14: 8116122-8131395    |
| BBS9         | ENSCAFG00000003161             | 14: 45200458-45643645  |
| BBS10        | ENSCAFG000000031800            | 15: 19331876-19335583  |
| CEP290       | ENSCAFG00000006027             | 15: 29194983-29280429  |
| CPE          | ENSCAFG00000008861             | 15: 61321227-61414789  |
| ADCY3        | ENSCAFG00000004090             | 17: 19154571-19232411  |
| POMC         | ENSCAFG00000004149             | 17: 19431585-19434440  |
| ALMS1        | ENSCAFG00000008827             | 17: 49301606-49513625  |
| BBS12        | ENSCAFG00000003998             | 19: 17538346-17540487  |
| BBS7         | ENSCAFG00000004128             | 19: 18280520-18315825  |
| PPARG        | ENSCAFG00000004991             | 20: 6050357-6207981    |
| UCP3         | ENSCAFG00000042759             | 21: 24277896-24288639  |
| TUB          | ENSCAFG00000006892             | 21: 31566130-31625101  |
| MKKS         | ENSCAFG00000005651             | 24: 11898236-11913740  |
| MC3R         | ENSCAFG00000011887             | 24: 41492371-41494033  |
| GNAS         | ENSCAFG00000023756             | 24: 43643405-43658657  |
| KSR2         | ENSCAFG00000009865             | 26: 13987827-14395111  |
| RYR3         | ENSCAFG00000008056             | 30: 1180359-1533619    |
| ARL6         | ENSCAFG00000009111             | 33: 4800917-4839635    |
| CEP19        | ENSCAFG00000013046             | 33: 29735351-29741128  |
| BBS5         | ENSCAFG00000041315             | 36: 14207014-14233633  |
| MSTN         | ENSCAFG00000009398             | 37: 729172-734362      |
